# Supplementary material
Source: Springer Nature journal article supplement (https://www.springermedizin.de/resource/supplementary/12879_2009_976_MOESM2_ESM.pdf/9449768)

**CD4+CD45RA+**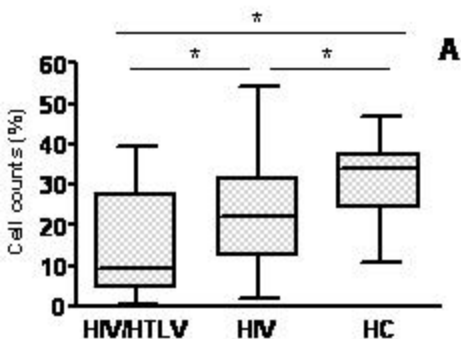**CD8CD45RA**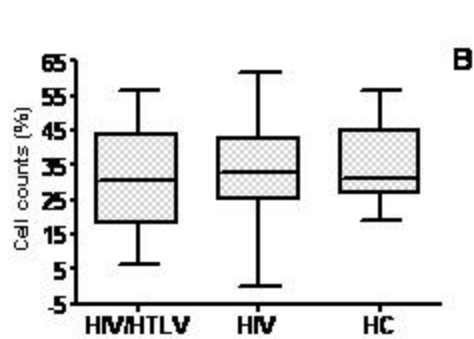**CD4+CD45RO+**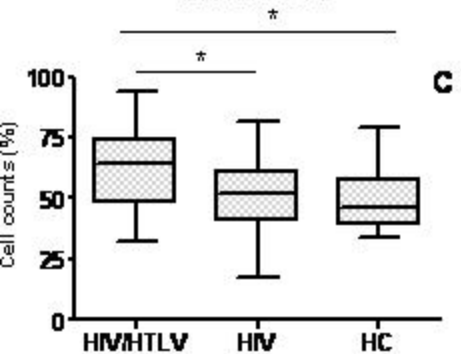**CD8+CD45RO+**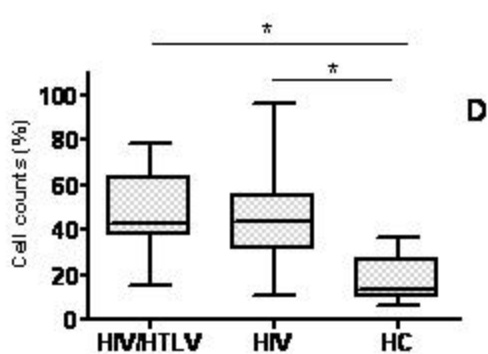**CD4+CD38+**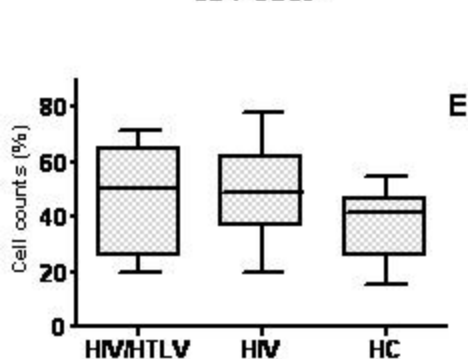**CD8+CD38+**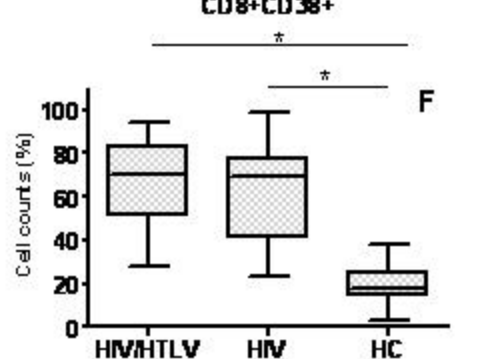**CD4+CD25+**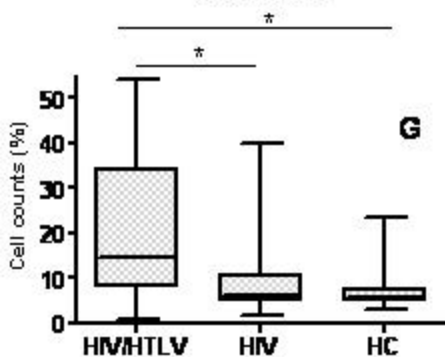**CD4+CD62L+**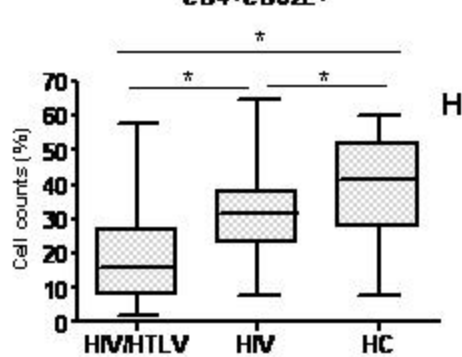

Supplement: MOESM2 [file 9449768]
